# Supplementary material for: Perspectives on advance directives in Japanese society: A population-based questionnaire survey
Source: Springer Nature journal article supplement (doi:10.1186/1472-6939-4-5), 2003-10-31
Supplement: Additional file 1 [file 1472-6939-4-5-s1.doc]

# Appendix: Survey concerning Advance Directive

1. Please indicate if you have encountered any of the following three experiences in the last five years.

　Hospitalization (yourself) YES NO

　Hospitalization (family member) YES NO

　Death of a family member, relative or friend YES NO

1. Please indicate if you have heard of the words “living will” or “death with dignity declaration”? Respond by choosing one of the three answers below:
   1. YES
   2. YES, but I am unsure of it’s meaning
   3. NO

* For those who have chosen “a,” please move onto Question 2-1.

* For those who have chosen “b” or “c,” please move onto Question 3.

2-1. Have you actually written up a living will or any other document concerning

end of life medical decisions?

1. YES
2. NO

1. Due to a sudden illness (i.e. stroke) or accident (i.e. traffic accident), it may become incapable of communicating and thus making decisions. In such a case, do you feel it is better to have expressed your wishes regarding medical treatment?
   1. Strongly agree
   2. Moderately agree
   3. Moderately disagree
   4. Strongly disagree

* For those of who have chosen “a” or “b,” please answer Questions 4 – 8.

* For those of who have chosen “c” or “d,” please move onto Question 9.

1. In Question 3, please indicate the reasons why you feel it is better to have expressed your wishes regarding medical treatment. (Please mark as many answers as you see fit.)

　I want to undergo the treatment of my choice

　There may be differences in opinions between family members

　This issue has become a topic in the mass media

　An acquaintance has spoken of this issue

　I hope to not burden my family with end-of-life decisions

　I want to make known my wishes regarding being a donor

　I want to seriously consider my end-of-life decisions

　I do not trust the current medical profession

　I want to decide for myself

　I am aware that I could possibly loose my decision making power as a result of becoming seriously ill or injured.

　Others: (Please use the space below to explain.)

1. Please indicate what you would like to express. (Please mark as many answers as you see fit.)

 Treatment related decisions in the case of becoming terminally ill.

(e.g. whether or not you wish to receive life-extending treatment.)

 Treatment related decisions regarding “pain” during terminal stages

(e.g. whether or not you wish to be treated with painkillers.)

 Whether or not you would like to be informed of your diagnosis and prognosis. (e.g. whether or not you would like all information to be directly disclosed to you.)

- Treatment related decisions in the case of brain death or long-term comatose.
- Expressing whether or not you would like to be a donor for transplantation.
- Expressing whether or not you would like to donate your body for educational purposes.
- End-of-life treatment related decisions.

(e.g. whether you would like to die in the hospital.)

- Others: (Please use the space below to explain.)

1. Please indicate how detailed you would like to describe your preferences when creating an AD.

　As detailed as possible. (i.e. heart massage, respirator)

　General preferences. (i.e. pain control, DNR order)

　Others: (Please use the space below to explain.)

　Do not know.

1. Supposing you have created an AD, please indicate to what extent you would like to be treated according to your AD.

　In absolute accordance.

　As much as possible; yet as long as my reasons are observed, the AD does not need to be strictly observed.

　Just as a reference.

　Others

　Do not know.

1. Please indicate how you would like to record your AD.
   1. Documented (this includes voice recording).
   2. Orally to a family member or acquaintance.
   3. Others: (Please use the space below to explain.)
   4. Do not know.

* For those of who have chosen “b,” “c” or “d,” please move onto Question 10.

** For those of who have chosen “a,” please move onto Question 8.1.

8.1. Please tell if you feel such documents need to be legalized (notarized).

1. Necessary.
2. Unnecessary.
3. Do not know.
4. In Question 3, please indicate the reasons why you feel it is not better to express your wishes regarding medical treatment. (Please mark as many answers as you see fit.)

　My family will make such decisions when the time is needed.

　My physician will make such decisions when the time is needed.

　I am currently healthy and there is no need to consider such decisions.

　At my present age, there is no need to consider such decisions.

　I have no information about ADs etc.

　I feel that I will never be in situation where I would need an AD.

　It is impossible to thing of such decisions for it is impossible to imagine oneself in such a situation.

　I do not want to think that I will eventually die or loose my memory.

　Others: (Please use the space below to explain.)

1. Please indicate if you have ever thought that it was good that an acquaintance, friend or family member made an AD.
   1. NO
   2. YES
2. Suppose that you are in extreme pain and your death is approaching with no hope of recovery. In such a case, would you choose: a) to have life-sustaining treatment regardless of the pain; or b) to refuse all life-sustaining treatment and elect only to have the pain subdued?

　Agree with “a.”

　Fairly agree with “a.”

　Fairly agree with “b.”

　Agree with “b.”

1. Suppose that you are in extreme pain and your death is approaching with no hope of recovery. In such a case, would you want: a) to have all information concerning your diagnosis, etc. disclosed to you; or b) to have nothing disclosed to you?

　Agree with “a.”

　Fairly agree with “a.”

　Fairly agree with “b.”

　Agree with “b.”

1. Please indicate if you intend to create a will?

　YES

　NO

　UNDECIDED

Lastly, please fill out the following information:

SEX: 　MALE 　FEMALE

AGE: _________________years of age.

EDU: 　Junior high school

　High school

　Junior college

　University/College or Graduate School

OCC: 　Self-employed

　Fulltime

　Part time

　Unemployed

　Other

REL: 　Buddhism

　Shinto

　Christian

　Other

　None

HEALTH 　Good

STATUS 　Fairly good

　Fairly poor

　Poor
